# Supplementary material for: The merit of pressure dependent kinetic modelling in steam cracking
Source: Royal Society of Chemistry journal article supplement (doi:10.1039/d2fd00032f), 2022-01-01
Supplement: d2fd00032f1.xlsx [file d2fd00032f1.xlsx]

## Sheet: Info
The merit of pressure dependent kinetic modelling in steam cracking
Jeroen Aerssens1, Florence Vermeire1, Syam Ukkandanth Arravindikashan, Ruben Van de Vijver1, Kevin M. Van Geem1, *
1 Laboratory for Chemical Technology (LCT), Ghent University, Technologiepark 125, B-9052 Ghent, Belgium
* Corresponding author: Kevin.VanGeem@UGent.be, Technologiepark 125, B-9052 Gent, Belgium
Supporting information: experimental data
Mass fractions for Ethane (C2 BSSC) and propane (C3 BSSC) in a tubular reactor
L = 149 cm and Ø = 0.6 cm
Mass flow ethane: 130 g/h
Mass flow propane: 130 g/h
Steam dilution: 0.4 g/g
Pressure: 1.7 bara

## Sheet: C2 BSSC
Run reference n°	815-01	815-02	815-03	825-08	825-09	825-10	835-01	835-02	835-03	845-03	845-05	845-06	845-07	855-01	855-02	855-03	875-01	875-03	885-01	885-02	885-03	885-04	895-01	895-02	895-03	895-04	905-01	905-02	905-03
COT [K]	1088	1088	1088	1098	1098	1098	1108	1108	1108	1118	1118	1118	1118	1128	1128	1128	1148	1148	1158	1158	1158	1158	1168	1168	1168	1168	1178	1178	1178
H2	3.03166	3.03012	2.96038	3.48481	3.48564	3.46036	3.56755	3.77214	3.78986	3.97329	4.114	4.09978	4.11619	4.37689	4.56783	4.57548	4.92593	5.09815	5.10192	5.12341	5.15106	5.18499	5.79308	5.91715	5.88463	5.78032	5.50737	5.74705	5.73121
CO	0.0272872	0.0315549	0.0161093	0.124883	0.117026	0.107755	0.0531788	0.0714359	0.0765252	0.121898	0.129536	0.131898	0.0825266	0.130621	0.133238	0.132677	0.126817	0.186901	0.170705	0.123365	0.272616	0.217913	0.22974	0.197949	0.169551	0.108707	0.173517	0.182841	0.161695
CH4	1.90179	1.88606	1.88041	2.58397	2.53279	2.53276	3.05036	3.17296	3.22256	4.07596	4.06578	4.2667	4.28072	5.17629	5.42607	5.48859	7.80694	7.57751	8.10743	8.5098	8.69481	8.54952	9.80219	10.0736	10.0925	9.82932	10.1434	10.7863	10.8471
CO2	0.00132325	0.000510301	0.000510301	7.60091e-05	0.000987912	0.000249731	-1.71123e-05	-3.48466e-05	0	0.00010684	0.000603006	0.00244008	0	0.000267971	0.00225221	0	0.000221961	0.00267038	0.0009635	0	0.00160765	0.000954711	0.000271581	-3.04936e-05	0.000653323	0	-2.85995e-05	2.92674e-05	-8.73288e-05
C2H2	0.19881	0.241655	0.218438	0.128633	0.172458	0.152333	0.225696	0.226144	0.248236	0.362685	0.385935	0.377242	0.397641	0.452339	0.462453	0.447235	0.602314	0.726775	0.765798	0.823807	0.880025	0.999831	1.10065	1.23073	1.33249	1.41761	1.29624	1.3762	1.44481
C2H4	40.4908	40.4624	40.4171	44.7909	44.8252	45.0167	47.9231	48.8602	48.7925	52.3244	52.0169	51.9966	51.9472	55.0928	54.6118	54.5827	57.5659	57.9214	56.9109	57.2402	57.361	57.2697	61.8503	62.0874	61.933	62.294	57.794	57.749	57.6933
C2H6	51.0543	51.0257	51.0458	44.2311	44.7696	44.8652	40.369	39.0547	38.4942	33.6232	33.1647	32.9055	32.7851	28.018	27.3448	27.4027	18.9323	19.0754	16.5743	15.6739	15.4934	15.4975	14.6985	13.7094	13.5439	13.4969	11.6864	10.7249	10.426
C3H6	0.722578	0.723862	0.714788	0.872297	0.858917	0.890271	1.01516	1.04755	1.05947	1.20296	1.17584	1.21234	1.23225	1.36043	1.34225	1.34747	1.43487	1.43383	1.39573	1.4104	1.41467	1.40734	1.37406	1.3718	1.36643	1.37536	1.30599	1.28246	1.29611
C3H8	0.0862435	0.0862435	0.0851297	0.10152	0.101125	0.103926	0.11185	0.114124	0.115766	0.126375	0.123303	0.126473	0.131816	0.130346	0.129598	0.139617	0.129975	0.12199	0.123099	0.110518	0.111521	0.111564	0.112248	0.101881	0.100894	0.100033	0.0880517	0.0833714	0.0855124
PD	0.00747165	0.00753305	0.00793302	0.00960053	0.00978643	0.0117549	0.0132824	0.0143459	0.0147495	0.0207495	0.0192082	0.0200917	0.0208219	0.0290432	0.0257332	0.0243435	0.037183	0.0349752	0.0403593	0.0427964	0.0410691	0.0409049	0.0445556	0.0491705	0.0495587	0.0492149	0.0471634	0.0520651	0.0518469
MeAc	0.000276153	0.000249623	0.000728178	0.0106796	0.0146708	0.0244416	0.0327409	0.0259882	0.0394935	0.046806	0.0537762	0.0490883	0.0525464	0.0706472	0.0623723	0.0682858	0.0829273	0.0810113	0.0952402	0.0979497	0.0973663	0.0950733	0	0	0	0	0.111127	0.109125	0.110287
n-C4H10	0.309802	0.312198	0.310524	0.275627	0.275509	0.289015	0.268536	0.255384	0.250876	0.218234	0.210194	0.208175	0.205325	0.178984	0.169898	0.169244	0.106089	0.108224	0.0936927	0.0842862	0.0827186	0.0826623	0.0720454	0.0630232	0.0628851	0.0620867	0.0563111	0.0489899	0.0469113
i-C4H10	0.00860351	0.00722986	0.00493058	0.0790633	0.0712769	0.0986789	0.00749697	0.186958	0.222384	0.355595	0.377558	0.379868	0.383512	0.00880559	0.464914	0.462886	0.62057	0.751376	0.798447	0.868435	0.917924	1.03771	1.03316	1.16408	1.27193	1.35593	1.2403	1.3209	1.39622
1,3-C4H6	0.615375	0.715624	0.775832	0.762833	0.482913	0.293234	0.889633	0.951826	1.36432	0.788915	1.66752	1.6536	1.7364	1.41425	2.31291	2.08782	2.58124	2.59891	2.59259	2.60175	2.57316	2.71373	2.64409	2.79529	2.83941	2.89592	2.60182	2.72261	2.69392
t-2-C4H8	0.0459926	0.0469994	0.0458843	0.0505622	0.0539728	0.0557191	0.0625711	0.068503	0.0674381	0.0728481	0.0715347	0.0733954	0.0760839	0.0920304	0.092837	0.0920171	0.114121	0.113209	0.110063	0.108007	0.110683	0.114169	0.1078	0.103425	0.102378	0.103163	0.103169	0.0996005	0.100143
c-2-C4H8	0.0328489	0.0349584	0.034585	0.03145	0.0378361	0.04461	0.0382519	0.0526301	0.0516382	0.0567241	0.0561498	0.0537859	0.0593418	0.066672	0.0690079	0.0662834	0.0806959	0.0827388	0.0781198	0.0776953	0.0787776	0.0843302	0.081738	0.0804143	0.0770426	0.0798268	0.0753828	0.0805016	0.0776841
1-C4H8	0.12977	0.131743	0.13023	0.123858	0.131412	0.143259	0.148773	0.156958	0.151481	0.153752	0.148322	0.145984	0.151544	0.165753	0.156407	0.153053	0.157019	0.158119	0.148912	0.14528	0.144623	0.151028	0.143361	0.140665	0.1348	0.138688	0.138256	0.128996	0.126073
i-C4H8	0.0015135	0.00232106	0.00231801	0.0028476	0.00725799	0.00477134	0.00346009	0.0044038	0.00480908	0.00553889	0.00655758	0.00539084	0.00720612	0.0136639	0.00730414	0.00801012	0.0108754	0.00995954	0.0101251	0.0102257	0.0100853	0.0109979	0.0107122	0.0125274	0.0100027	0.0106339	0.00935562	0.0206103	0.0122081
cyclopentene	0	0	0	0.104469	0.0997201	0.0916802	0	0	0	0	0	0	0	0	0	0	0.0468428	0.0368416	0.0325743	0.0328892	0.0310655	0.0295316	0.00434953	0.0043424	0.00432538	0.00435366	0	0	0
1,3-cyclopentadiene	0.927022	0.819853	0.889224	1.13694	1.08526	0.997764	0.829997	0.667552	0.704538	0.66635	0.568873	0.618241	0.592051	0.747625	0.537546	0.583429	0.704995	0.554474	0.854219	0.862478	0.814654	0.77443	0.840452	0.839074	0.835786	0.84125	0.768991	0.75514	0.763179
1-methyl-1,3-cyclopentadiene	0	0	0	0	0	0	0	0	0	0	0	0	0	0.0535692	0.0385165	0.0418041	0.0653143	0.0513693	0.0367497	0.037105	0.0350476	0.0333171	0.0328825	0.0328285	0.0326999	0.0329137	0	0	0
5-methyl-1,3-cyclopentadiene	0	0	0	0	0	0	0	0	0	0	0	0	0	0.0239976	0.0172544	0.0187271	0.0404121	0.0317838	0.0399852	0.0403718	0.0381332	0.0362504	0	0	0	0	0	0	0
benzene	0.406602	0.43324	0.459143	1.09387	0.866659	0.815449	1.38939	1.29615	1.32908	1.80358	1.6437	1.67336	1.60248	1.92248	1.66902	1.72126	2.79408	2.41139	4.42327	4.46603	4.21839	4.20136	4.57139	4.56389	4.54601	4.57573	5.01373	4.92342	4.97584
1,3-cyclohexadiene	0	0	0	0	0	0	0	0	0	0	0	0	0	0.058505	0.0420654	0.0456559	0.0557957	0.043883	0.0595871	0.0601632	0.0568272	0.0540213	0	0	0	0	0.0528238	0.0518724	0.0524246
Methylcyclohexane	0	0	0	0	0	0	0	0	0	0	0	0	0	0	0	0	0	0	0	0	0	0	0	0	0	0	0	0	0
Toluene	0	0	0	0	0	0	0	0	0	0	0	0	0	0.166484	0.134573	0.146059	0.328142	0.27714	0.484041	0.488721	0.461621	0.438829	0.468235	0.467467	0.465635	0.46868	0.550404	0.54049	0.546245
o-xylene	0	0	0	0	0	0	0	0	0	0	0	0	0	0.0179618	0.0129146	0.014017	0.0699395	0.0550069	0.1143	0.115405	0.109006	0.103624	0.0896337	0.0894867	0.089136	0.0897188	0.0649448	0.063775	0.0644539
ethylbenzene	0	0	0	0	0	0	0	0	0	0	0	0	0	0.0288723	0.0207594	0.0225313	0.0273355	0.0214992	0.0139636	0.0140986	0.0133168	0.0126593	0.0464874	0.0464112	0.0462293	0.0465316	0.0158385	0.0155532	0.0157188
Styrene	0	0	0	0	0	0	0	0	0	0	0	0	0	0.116538	0.0837916	0.0909437	0.247894	0.194967	0.321069	0.324174	0.306198	0.29108	0.390831	0.39019	0.388661	0.391202	0.419813	0.412251	0.41664
Indene	0	0	0	0	0	0	0	0	0	0	0	0	0.139292	0.0334056	0.0240188	0.0260689	0.0933835	0.0734455	0.155734	0.15724	0.148521	0.141188	0.271531	0.271086	0.270024	0.271789	0.24304	0.238662	0.241203
Naphthalene	0	0	0	0	0	0	0	0	0	0	0	0	0	0.0527009	0.0378922	0.0411265	0.209894	0.165081	0.346127	0.349473	0.330095	0.313796	0.0996779	0.0995144	0.0991245	0.0997726	0.465986	0.457593	0.462464

## Sheet: C3 BSSC
Run reference n°	785-4	785-5	785-6	785-7	795-5	795-6	795-7	795-8	805-1	805-2	805-3	805-4	805-5	815-1	815-2	815-3	815-4	825-1	825-2	825-3	835-1	835-2	835-3	845-1	845-2	845-3	845-4	855-4	855-5	855-6	865-1	865-2	865-3
COT[K]	1058	1058	1058	1058	1068	1068	1068	1068	1078	1078	1078	1078	1078	1088	1088	1088	1088	1098	1098	1098	1108	1108	1108	1118	1118	1118	1118	1128	1128	1128	1138	1138	1138
H2	0.91011	0.904269	0.909624	0.904878	1.21756	1.20622	1.20756	1.2024	1.27309	1.30579	1.31142	1.31895	1.30968	1.51804	1.51178	1.50154	1.52528	1.61715	1.59447	1.61802	1.75526	1.68198	1.76395	1.81107	1.76503	1.81579	1.75111	1.82101	1.80049	1.78087	1.99972	2.0248	2.04972
CH4	11.6653	11.6968	11.7277	11.8051	15.1449	15.0635	14.9803	14.9047	16.1746	16.8442	16.9174	17.0889	16.9907	19.2835	18.8776	19.1008	19.1763	21.618	21.6256	21.6739	23.3436	23.374	23.401	24.4312	24.5389	24.6838	24.6794	26.8442	26.4926	26.4634	28.1944	28.1199	28.1819
CO2	1.19712	1.1097	1.10035	0.989139	0.0114313	0.00441608	0.000529506	0.00223364	0.00397546	7.1879e-05	2.87654e-05	5.7597e-05	4.31447e-05	0.00807992	0.00837882	0.00779026	0.00793601	0.0136046	0.010536	0.00878162	0.0131435	0.010102	0.0100127	0.00353265	0.00323618	0.00304742	0.00397577	0.000474125	0	0	0.0124095	0.0116966	0.00663119
CO	2.01073	2.00731	1.98207	1.98731	0.0855935	0.10979	0.0702766	0.0859666	0.104335	0.0859671	0.113449	0.0371575	0.0239026	0.0187026	0.0176755	0.0513398	0.0182125	0.112053	0.0681003	0.0650538	0.103638	0.0876999	0.0770841	0.0662418	0.0656006	0.0822549	0.0598048	0.231733	0.19591	0.162723	0.111786	0.117128	0.11946
C2H2	0.0297387	0.0442765	0.0737097	0.0964068	0.127313	0.144652	0.155466	0.17066	0.19018	0.201573	0.215966	0.247174	0.259161	0.328019	0.329246	0.33343	0.344596	0.426722	0.440347	0.447246	0.471626	0.51597	0.518042	0.706049	0.658689	0.609548	0.612208	0.72256	0.744729	0.795897	0.365329	0.714626	0.784448
C2H4	20.6614	20.7391	20.7714	20.8334	24.9787	24.8943	24.829	24.7467	26.6743	27.7401	27.9373	28.1368	28.0604	31.3722	30.9316	31.0849	31.1864	34.518	34.4641	34.5209	36.8072	36.8177	36.7749	38.0602	38.3289	38.3024	38.3473	40.3111	40.1601	40.0682	42.185	41.8843	41.7984
C2H6	1.63417	1.6456	1.65109	1.6555	2.15924	2.12975	2.10771	2.08403	2.27728	2.37265	2.38616	2.40625	2.38061	2.7204	2.58613	2.64512	2.67543	2.95713	2.94277	2.96458	3.13841	3.12837	3.12773	3.28223	3.30133	3.30776	3.31189	3.35687	3.2708	3.25567	3.47756	3.48272	3.47758
PD	0.0553614	0.055668	0.0569358	0.054861	0.0756453	0.0741696	0.0750829	0.0763171	0.0855677	0.0953446	0.0958293	0.0992707	0.0999295	0.127239	0.129331	0.127371	0.126173	0.142488	0.141394	0.142176	0.153795	0.154891	0.155209	0.16677	0.168961	0.164741	0.165604	0.161196	0.163232	0.168043	0.179367	0.173209	0.172672
MeAc	0.0939535	0.106731	0.121957	0.108394	0.145316	0.147387	0.149665	0.147945	0.156841	0.185829	0.189902	0.189841	0.194236	0.261939	0.264489	0.265315	0.260071	0.278701	0.281674	0.278541	0.318906	0.323325	0.32153	0.359519	0.345991	0.341985	0.349913	0.357153	0.362323	0.36727	0.41845	0.393262	0.38324
C3H6	17.8274	17.904	17.9123	17.8013	18.8105	18.7651	18.7586	18.756	18.8796	18.9166	18.9936	18.8714	18.8984	18.4928	18.6193	18.6262	18.6183	17.039	17.0947	17.0866	15.7456	15.7312	15.6938	14.6516	14.6631	14.5849	14.6	11.127	11.3382	11.3712	10.3886	10.3553	10.3469
C3H8	42.1837	42.0729	41.9356	41.9731	33.9002	34.2	34.4479	34.6177	31.2856	29.1887	28.5983	28.3326	28.4829	22.2485	23.1289	22.6595	22.4475	16.5708	16.6395	16.4881	12.0993	12.1011	12.1151	10.3186	10.2745	10.2504	10.2212	5.26178	5.5319	5.55982	4.33558	4.27448	4.28291
i-C4H8	0.10959	0.109766	0.11921	0.120619	0.0968603	0.0955806	0.0959371	0.0964968	0.102134	0.110228	0.112913	0.112085	0.112956	0.12284	0.119293	0.120721	0.121991	0.131134	0.128583	0.131893	0.126704	0.128847	0.133376	0.126501	0.127011	0.126	0.127497	0.105116	0.105333	0.108145	0.0974176	0.0969376	0.0966043
1-C4H8	0.963921	0.956783	0.98682	0.98592	0.88682	0.884458	0.891001	0.90072	0.918857	0.921961	0.935937	0.926323	0.932094	0.88626	0.912364	0.903008	0.89653	0.774139	0.777069	0.781	0.634545	0.640514	0.636771	0.609594	0.603461	0.600292	0.601708	0.364001	0.384965	0.392818	0.332442	0.337997	0.340038
i-C4H10	0.122436	0.123542	0.122736	0.121985	0.0424567	0.0427973	0.0421042	0.0430666	0.0412628	0.0412625	0.0403495	0.0407924	0.040361	0.035382	0.0358659	0.0359403	0.0348439	0.0295871	0.0293221	0.0311915	0.0212885	0.0199856	0.0210828	0.0189299	0.0210549	0.0187624	0.0183806	0.0085402	0.00853129	0.00868362	0.00958436	0.00677012	0.00714702
t-2-C4H8	0.131813	0.131257	0.134639	0.135495	0.162314	0.157698	0.156766	0.158519	0.164379	0.172166	0.175898	0.174591	0.17618	0.179952	0.176306	0.176533	0.178798	0.178173	0.17735	0.177385	0.177661	0.174342	0.172318	0.174316	0.172577	0.17191	0.171074	0.142204	0.147616	0.145585	0.145005	0.145701	0.145496
1,3-C4H6	0.0961772	0.0846379	0.0767134	0.115164	1.24177	1.16989	1.12217	1.09706	1.1031	1.24431	1.39783	1.44233	1.46262	1.84679	1.80103	1.80945	1.83028	2.19691	2.18809	2.1908	2.36828	2.39294	2.35986	2.94217	2.68869	2.67645	2.71716	2.96573	2.95598	2.99391	2.92006	3.0509	3.00121
n-C4H10	0.0330171	0.0319393	0.0336673	0.0324147	0.0211207	0.0209679	0.0209863	0.0212045	0.0216575	0.0222669	0.0222765	0.0237516	0.0239808	0.023409	0.0227381	0.0227446	0.0232066	0.0272836	0.0236735	0.0221205	0.0219974	0.0215442	0.0211013	0.0231001	0.0242496	0.0227094	0.0223636	0.0165792	0.0176105	0.0183251	0.0195254	0.0172902	0.0180763
c-2-C4H8	0.103024	0.104018	0.111654	0.108303	0.118928	0.117912	0.117757	0.117197	0.1232	0.130034	0.132762	0.131873	0.131309	0.136818	0.136322	0.13645	0.136446	0.137231	0.136891	0.136404	0.134617	0.133401	0.141043	0.131945	0.130556	0.130411	0.13046	0.104872	0.106101	0.107788	0.108249	0.108479	0.106883
2-methyl-1,3-butadiene	0.0241353	0.0242389	0.0242502	0.0240998	0.0491211	0.0490026	0.0489856	0.0489787	0.0338045	0.0338708	0.0340087	0.0337898	0.0338382	0.0146659	0.0147662	0.0147717	0.0147654	0.0397087	0.0398386	0.0398196	0.0372089	0.0371748	0.0370866	0.0338177	0.0338444	0.0336638	0.0336987	0.0895243	0.0912235	0.0914893	0.0396295	0.0395025	0.0394703
cyclopentene	0.0241612	0.0242649	0.0242762	0.0241257	0.041818	0.0417172	0.0417027	0.0416968	0.0274904	0.0275444	0.0276566	0.0274785	0.0275179	0.01213	0.012213	0.0122175	0.0122123	0.0340952	0.0342067	0.0341904	0.0226733	0.0226526	0.0225988	0.0538413	0.0538838	0.0535963	0.0536518	0.0608841	0.0620396	0.0622204	0.0194318	0.0193696	0.0193538
1,3-cyclopentadiene	0.0533965	0.0536257	0.0536507	0.0533181	0.218354	0.217828	0.217752	0.217721	0.126331	0.126579	0.127095	0.126277	0.126457	0.0741457	0.0746527	0.0746804	0.0746486	0.183671	0.184271	0.184183	0.331807	0.331503	0.330716	0.269407	0.26962	0.268181	0.268459	0.971231	0.989665	0.992549	0.449029	0.447591	0.447226
1,3-pentadiene	0	0	0	0	0.0110976	0.0110708	0.011067	0.0110654	0.0141141	0.0141418	0.0141993	0.0141079	0.0141281	0.0103793	0.0104502	0.0104541	0.0104497	0.0249919	0.0250736	0.0250617	0.0301162	0.0300887	0.0300172	0.033463	0.0334894	0.0333108	0.0333452	0.0413313	0.0421157	0.0422385	0.0262443	0.0261602	0.0261389
benzene	0.047688	0.0478927	0.047915	0.047618	0.272775	0.272117	0.272022	0.271984	0.131177	0.131434	0.131969	0.13112	0.131308	0.212407	0.21386	0.213939	0.213848	0.699549	0.701836	0.701503	1.61082	1.60934	1.60552	1.32855	1.3296	1.32251	1.32388	3.04058	3.09829	3.10732	3.18128	3.17108	3.1685
fulvene	0	0	0	0	0	0	0	0	0	0	0	0	0	0.00660204	0.00664719	0.00664965	0.00664683	0.0212373	0.0213067	0.0212966	0.023798	0.0237762	0.0237198	0.0182253	0.0182397	0.0181424	0.0181611	0.0347762	0.0354363	0.0355395	0.0159708	0.0159196	0.0159067
cyclohexadiene	0	0	0	0	0.0198168	0.019769	0.0197622	0.0197594	0.00989425	0.00991368	0.00995403	0.00988996	0.00990412	0.00906254	0.00912451	0.00912789	0.00912401	0.019305	0.0193682	0.0193589	0.0219316	0.0219115	0.0218595	0.0185558	0.0185704	0.0184714	0.0184905	0.0754526	0.0768847	0.0771087	0.0215036	0.0214347	0.0214172
1-Methyl-1,3-cyclopentadiene	0.00894932	0.00898774	0.00899193	0.00893619	0.0367741	0.0366855	0.0366727	0.0366675	0.0216986	0.0217412	0.0218297	0.0216892	0.0217203	0.00966058	0.00972665	0.00973025	0.00972611	0.018408	0.0184682	0.0184594	0.0363094	0.0362761	0.03619	0.0339472	0.0339739	0.0337927	0.0338277	0.096327	0.0981553	0.0984413	0.0346509	0.0345398	0.0345117
5-methyl-1,3-cyclopentadiene	0.00577254	0.00579731	0.00580002	0.00576407	0.04262	0.0425172	0.0425025	0.0424965	0.0278985	0.0279532	0.028067	0.0278864	0.0279263	0.0150253	0.0151281	0.0151337	0.0151272	0.0337121	0.0338223	0.0338062	0.0387425	0.038707	0.0386151	0.031679	0.031704	0.0315348	0.0315675	0.0547668	0.0558063	0.0559689	0.038922	0.0387972	0.0387656
toluene	0.0069199	0.0069496	0.00695284	0.00690974	0.0531097	0.0529817	0.0529633	0.0529558	0.0276523	0.0277066	0.0278194	0.0276403	0.0276799	0.0249196	0.02509	0.0250993	0.0250886	0.0797661	0.0800269	0.0799889	0.254461	0.254228	0.253624	0.150279	0.150397	0.149595	0.14975	0.655418	0.667858	0.669804	0.483619	0.482069	0.481676
ethylbenzene	0	0	0	0	0	0	0	0	0	0	0	0	0	0	0	0	0	0.00795283	0.00797884	0.00797504	0.011424	0.0114135	0.0113865	0.0108313	0.0108398	0.010782	0.0107932	0	0	0	0.0162176	0.0161656	0.0161524
o-xylene	0	0	0	0	0	0	0	0	0	0	0	0	0	0	0	0	0	0.00996194	0.00999451	0.00998976	0.0171129	0.0170972	0.0170566	0.0149045	0.0149163	0.0148367	0.014852	0	0	0	0.0240573	0.0239802	0.0239606
Styrene	0	0	0	0	0.00614909	0.00613426	0.00613213	0.00613126	0	0	0	0	0	0	0	0	0	0.0281458	0.0282379	0.0282244	0.0767706	0.0767003	0.0765183	0.0581546	0.0582005	0.05789	0.05795	0.484631	0.493829	0.495268	0.206008	0.205348	0.20518
Indane	0	0	0	0	0	0	0	0	0	0	0	0	0	0	0	0	0	0.0104071	0.0104411	0.0104361	0.00356004	0.00355678	0.00354833	0.00755488	0.00756084	0.0075205	0.00752829	0.00675619	0.00688442	0.00690448	0.00649057	0.00646977	0.00646449
Indene	0	0	0	0	0.00858873	0.00856802	0.00856505	0.00856384	0	0	0	0	0	0	0	0	0	0	0	0	0.0215405	0.0215207	0.0214697	0.0181344	0.0181487	0.0180519	0.0180706	0.209877	0.21386	0.214484	0.0574713	0.0572872	0.0572405
Naphthalene	0	0	0	0	0.0130599	0.0130284	0.0130239	0.0130221	0	0	0	0	0	0	0	0	0	0.0209038	0.0209721	0.0209622	0.0262207	0.0261967	0.0261345	0.0168915	0.0169048	0.0168146	0.016832	0.276337	0.281581	0.282402	0.0676886	0.0674717	0.0674167

## Sheet: C2 T profile
Axial position [m]	815-01	815-02	815-03	825-08	825-09	825-10	835-01	835-02	835-03	845-03	845-05	845-06	845-07	855-01	855-02	855-03	875-01	875-03	885-01	885-02	885-03	885-04	895-01	895-02	895-03	895-04	905-01	905-02	905-03
0	673	673	673	673	673	673	673	673	673	673	673	673	673	673	673	673	673	673	673	673	673	673	673	673	673	673	673	673	673
0.19	955.133	959.167	962.933	976.433	976.967	981.167	993.6	996.2	993.633	1006.97	1009.63	1012.67	1019.03	1023.27	1024	1021.53	1043.93	1045.9	1057.93	1054.1	1057.8	1058.33	1056.97	1059.63	1062.67	1056.2	1045.13	1049.17	1052.93
0.38	1087.73	1088.1	1087.97	1098.4	1097.7	1097.83	1108.07	1107.9	1107.93	1117.77	1118.6	1118.07	1122.6	1127.93	1128.33	1128.17	1147.97	1148.4	1158.13	1158.23	1157.7	1158.07	1167.77	1168.6	1168.07	1167.9	1177.73	1178.1	1177.97
0.48	1087.97	1088.17	1088.03	1097.9	1097.93	1097.97	1108.1	1108.03	1107.93	1117.93	1118.23	1118.2	1122.03	1128.1	1128.17	1128.07	1148	1148.23	1158.07	1158.07	1157.9	1158.03	1167.93	1168.23	1168.2	1168.03	1177.97	1178.17	1178.03
0.67	1087.97	1088	1088	1097.93	1097.97	1097.97	1108.03	1107.97	1107.97	1117.97	1118.2	1118.1	1120.83	1128.07	1128.13	1128.03	1148	1148.13	1158.07	1158.07	1157.93	1158.03	1167.97	1168.2	1168.1	1167.97	1177.97	1178	1178
0.86	1087.97	1087.97	1088	1098	1098	1097.97	1108.07	1108	1107.97	1118	1118.2	1117.93	1118.23	1127.97	1128.03	1128.07	1148.07	1148.03	1158.03	1158.07	1157.93	1158	1168	1168.2	1167.93	1168	1177.97	1177.97	1178
1.05	1087.97	1088	1088	1098	1097.97	1097.97	1108	1107.97	1108	1117.97	1118.07	1117.93	1118.3	1127.97	1128.07	1128	1148	1148.03	1158	1158.03	1157.93	1158	1167.97	1168.07	1167.93	1167.97	1177.97	1178	1178
1.24	1088	1088	1088	1098	1098	1098	1108	1107.97	1108.03	1117.97	1118.03	1117.93	1118.07	1127.97	1128.03	1128	1148	1148	1158.03	1158.07	1158	1158	1167.97	1168.03	1167.93	1167.97	1178	1178	1178
1.43	988.067	988.033	988.033	997.7	998	998.167	1007.9	1008.17	1008.03	1018.17	1017.6	1018.47	1020.13	1028.27	1027.93	1027.83	1047.93	1048.07	1057.97	1057.77	1058.13	1057.97	1068.17	1067.6	1068.47	1068.17	1078.07	1078.03	1078.03

## Sheet: C3 T profile
Axial position [m]	785-4	785-5	785-6	785-7	795-5	795-6	795-7	795-8	805-1	805-2	805-3	805-4	805-5	815-1	815-2	815-3	815-4	825-1	825-2	825-3	835-1	835-2	835-3	845-1	845-2	845-3	845-4	855-4	855-5	855-6	865-1	865-2	865-3
0	673	673	673	673	673	673	673	673	673	673	673	673	673	673	673	673	673	673	673	673	673	673	673	673	673	673	673	673	673	673	673	673	673
0.19	937.967	937.967	938.133	938	950.233	951.533	952.633	951.533	966.033	967.7	968.8	969.367	971.3	962.9	963.833	966.467	968	984.233	984.8	985.3	973.5	979.133	983.167	1006.93	1007.2	1007.4	1007.63	1028.17	1029.17	1028.93	1012.3	1015.03	1017.27
0.38	1058.03	1058	1058.03	1057.97	1068	1068	1068	1068	1078.03	1078.03	1078.03	1077.97	1078.43	1088.27	1087.77	1087.93	1087.93	1097.9	1098	1097.73	1108.17	1108.1	1108.4	1117.87	1118.03	1118.23	1118.27	1128.03	1127.97	1128.07	1138.17	1138.13	1138
0.48	1058	1058	1058	1058.03	1068	1068	1068	1068	1078	1077.97	1078.03	1078	1078.3	1088.1	1087.93	1087.97	1087.97	1098	1098	1097.9	1108.07	1108.03	1108.2	1117.93	1118.03	1118.1	1118.13	1128	1128	1128.03	1138.13	1138	1138
0.67	1057.97	1058.03	1057.97	1057.97	1068	1068.03	1068	1068.03	1078	1078	1077.97	1078	1078.33	1088.07	1087.9	1088	1087.93	1098	1098.03	1097.9	1108.1	1108.03	1108.1	1117.97	1118	1118.1	1118.13	1127.97	1128	1128.03	1138.1	1138.03	1138
0.86	1058	1058	1058	1058	1068	1068	1068	1068	1078	1078	1078	1078	1078.1	1088	1087.97	1087.97	1087.97	1097.97	1098	1098	1108.03	1108	1108.03	1118	1118	1118.03	1118	1128	1128	1128	1137.97	1138.03	1138
1.05	1058	1058	1058	1058	1068	1068.03	1068	1068.03	1078	1077.97	1078	1078	1078.2	1088.03	1088	1088	1088	1097.93	1098	1097.97	1108.03	1107.97	1108.07	1118	1118	1118.03	1118.1	1128	1128	1128	1138.07	1137.97	1138.03
1.24	1058	1058	1058	1058.03	1068	1068	1068	1068	1078.03	1078	1078	1078	1078.13	1088.03	1087.97	1088	1088	1098	1098	1097.97	1108.07	1108	1108.07	1117.97	1118	1118.07	1118.07	1128	1128	1128	1138.07	1138	1138
1.43	967.967	968	967.9	968.033	978.033	977.967	978	977.967	987.967	988	988	987.967	988.1	995.967	997.267	997.667	998.167	1010.8	1010.7	1010.73	1011.57	1012.37	1013.17	1036.07	1036.1	1036.1	1036	1048	1048	1048	1049.37	1050.17	1050.93
