# Supplementary material for: The merit of pressure dependent kinetic modelling in steam cracking
Source: Royal Society of Chemistry journal article supplement (doi:10.1039/d2fd00032f), 2022-01-01
Supplement: d2fd00032f3.pdf [file d2fd00032f3.pdf]

## Supporting information

# The Merit of Pressure Dependent Kinetic Modelling in Steam Cracking

Jeroen Aerssens<sup>1</sup>, Florence Vermeire<sup>1</sup>, Syam Ukkandanth Arravindikashan<sup>1</sup>, Ruben

Van de Vijver<sup>1</sup>, Kevin M. Van Geem<sup>1,\*</sup>

<sup>1</sup> Laboratory for Chemical Technology (LCT), Ghent University, Technologiepark 125, B-9052 Ghent, Belgium

\* Corresponding author: [Kevin.VanGeem@UGent.be](mailto:Kevin.VanGeem@UGent.be), Technologiepark 125, B-9052 Gent, Belgium;

# 1. Experimental bench scale steam cracker setup

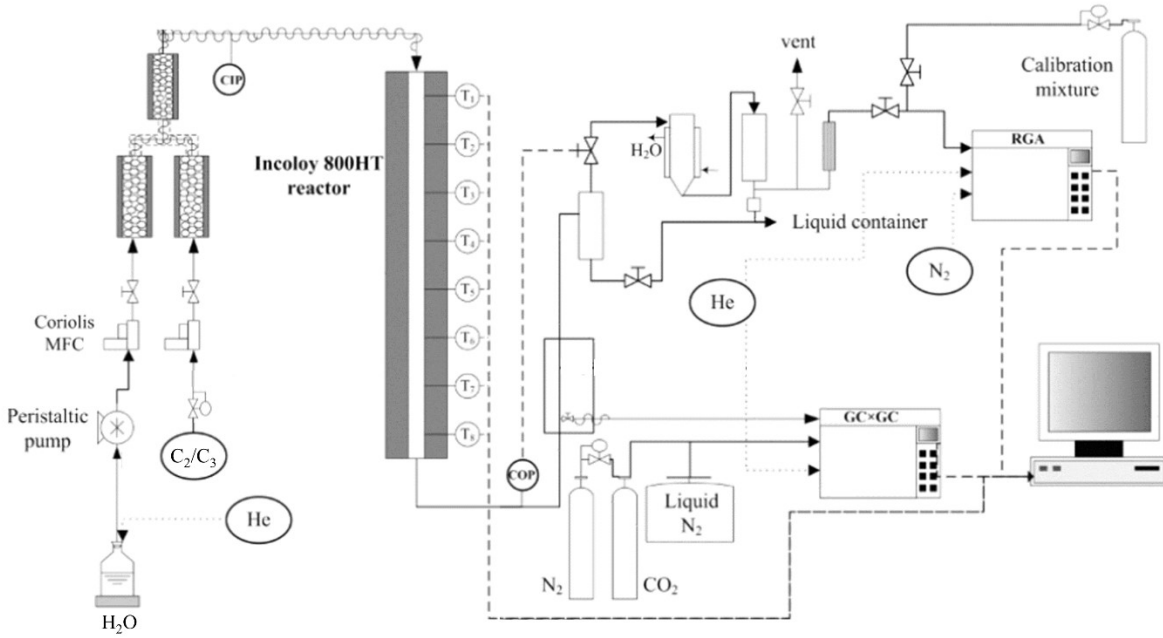

Figure 1: Schematic overview of the bench scale steam cracker.

## 2. Experimental results

The experimental data acquired for the steam cracking of ethane and propane on a bench scale steam cracker (tubular reactor) is provided as a separate Excel spreadsheet. Detailed temperature profiles are also available in this spreadsheet.

### 3. PCA using Quantis

Below one can find the data quality assessment that was performed in Quantis. Run reference numbers are referenced in the experimental data.

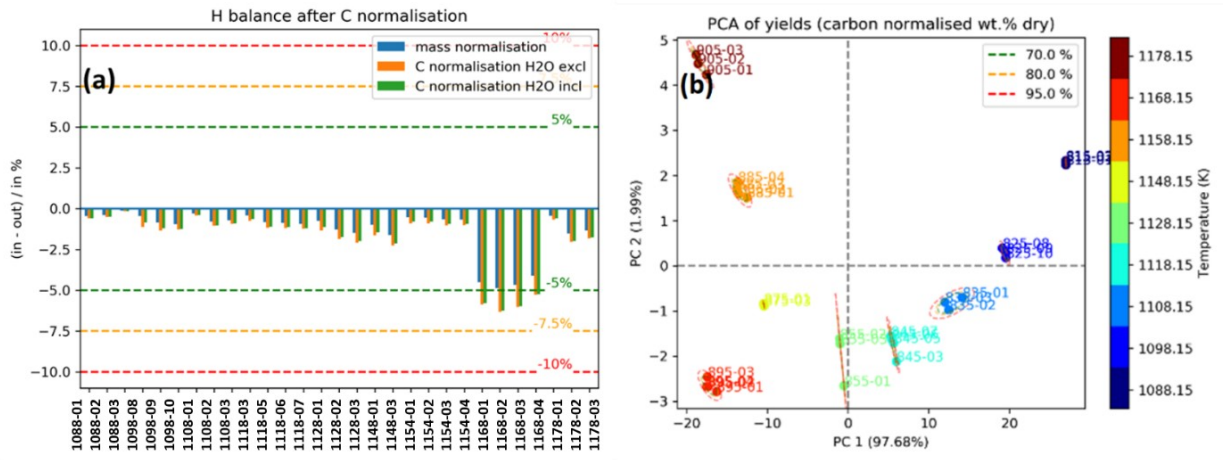

Figure 2: Data quality assessment of ethane steam cracking results: a) H balance of the experiments after carbon normalization b) PCA of carbon normalized yields of all GC injections.

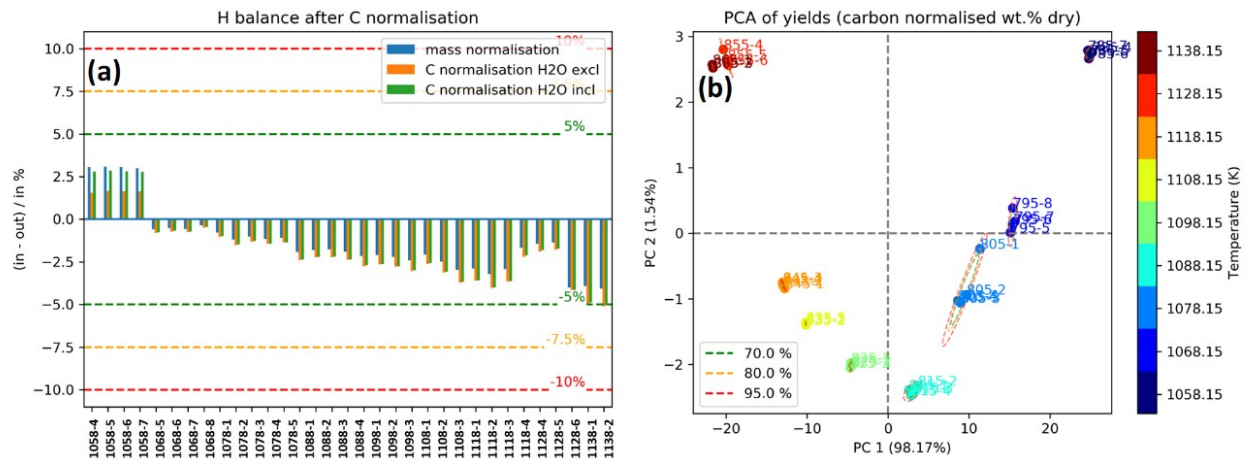

Figure 3: Data quality assessment of propane steam cracking results: a) H balance of the experiments after carbon normalization balance b) PCA of carbon normalized yields of all GC injections.

## 4. Kinetic model

The kinetic model in CHEMKIN format developed for the pyrolysis of ethane and propane is provided as a separate text file. This model corresponds to the P dep. case. Other cases can be reconstructed by disabling the P dependent parameters (TROE or PLOG format, at the end of this file) and enabling the high pressure limit that is provided.
